# Supplementary material
Source: PubMed Central journal article supplement (PMC4027728)
Supplement: ml400296c_si_001.pdf [file ml400296c_si_001.pdf]

## **--Supporting Information--**

### ***Is NMR fragment screening fine-tuned to assess the druggability of protein-protein interactions?***

David M. Dias,<sup>†</sup> Inge Van Molle,<sup>†‡</sup> Matthias G. J. Baud,<sup>†§</sup> Carles Galdeano,<sup>†§</sup>  
Carlos F. G. C. Geraldés,<sup>¥</sup> and Alessio Ciulli\*<sup>†§</sup>

<sup>†</sup> Department of Chemistry, University of Cambridge, Cambridge, CB2 1EW, UK

<sup>¥</sup> Department of Life Sciences, Faculty of Science and Technology, Centre for Neurosciences and Cell Biology and Chemistry Centre, University of Coimbra, Coimbra, Portugal

\*Corresponding Author: a.ciulli@dundee.ac.uk

Present addresses:

<sup>§</sup> College of Life Sciences, Division of Biological Chemistry and Drug Discovery, University of Dundee, Dow Street, Dundee, DD1 5EH, UK

<sup>‡</sup> VIB Department of Structural Biology, Structural Biology Brussels, Vrije Universiteit Brussel, Belgium

#### Contents:

|                                             |     |
|---------------------------------------------|-----|
| 1. Protein expression and purification..... | S2  |
| 2. Chemicals and synthesis.....             | S2  |
| 3. NMR experiments.....                     | S9  |
| 4. X-ray diffraction experiments .....      | S10 |
| 5. ITC experiments .....                    | S11 |
| 6. Figures .....                            | S12 |
| 7. Group Epitope Mapping (GEM) .....        | S22 |
| 8. References .....                         | S23 |

## 1 - Protein expression and purification

The pVHL:ElonginC:ElonginB (VCB) complex for biophysical and crystallization studies was obtained as previously described.<sup>1,2</sup>

For <sup>15</sup>N fully-labeled VCB protein preparation, the following minimal medium was used: 6 g/L Na<sub>2</sub>HPO<sub>4</sub>, 3 g/L KH<sub>2</sub>PO<sub>4</sub>, 0.5 g/L NaCl, 2 g/L <sup>15</sup>N-NH<sub>4</sub>Cl, 3 g/L D-Glucose, 0.011 g/L CaCl<sub>2</sub>, 0.12 g/L MgSO<sub>4</sub>, 2 mL/L of 1000× trace elements stock solution (0.5 g/L CaCl<sub>2</sub>·2H<sub>2</sub>O, 16.7 mg/L FeCl<sub>3</sub>·6H<sub>2</sub>O, 0.18 g/L CuSO<sub>4</sub>·5H<sub>2</sub>O, 0.11 g/L MnSO<sub>4</sub>·H<sub>2</sub>O, 0.18 g/L CoCl<sub>2</sub>·6H<sub>2</sub>O and 20.1 g/L EDTA). Cultures were inoculated with 1:40 v/v of steady state seed culture, grown at 37°C to an OD<sub>600</sub> of 0.9 and induced with 0.6 mM IPTG overnight at 24°C. Afterwards, the VCB complex was purified in the same way as unlabeled protein. The final yield was ~64 mg of <sup>15</sup>N-VCB from 6 liters of the culture (~11 mg per liter).

## 2 - Chemicals and synthesis

All reagents and solvents were obtained from commercial sources, and used as supplied unless otherwise indicated. Reactions requiring anhydrous conditions were conducted in heated glassware (heat gun), under an inert atmosphere (argon), and using anhydrous solvents. CH<sub>2</sub>Cl<sub>2</sub>, toluene and MeOH were distilled over CaH<sub>2</sub>. Et<sub>2</sub>O was distilled on CaH<sub>2</sub>/LiAlH<sub>4</sub>. All reactions were monitored by analytical thin-layer chromatography (TLC) using indicated solvent systems on E. Merck silica gel 60 F254 plates (0.25 mm). TLC plates were visualized using UV light (254 nm) and/or by staining in potassium permanganate followed by heating. Solvents were removed by rotary evaporator below 40°C and the compounds further dried using high vacuum pumps.

<sup>1</sup>H and <sup>13</sup>C NMR were recorded on a Bruker Advance 400 MHz and 100 MHz NMR spectrometer respectively. Chemical shifts (δ H) are quoted in ppm (parts per million) and referenced to residual solvent signals: <sup>1</sup>H δ = 7.26 (CDCl<sub>3</sub>), 2.50 (*d*<sub>6</sub>-DMSO), 3.31 (CD<sub>3</sub>OD), <sup>13</sup>C δ = 77.0 (CDCl<sub>3</sub>), 39.43 (*d*<sub>6</sub>-DMSO), 49.05 (CD<sub>3</sub>OD). Coupling constants (*J*) are given in Hz. High resolution mass spectra (ESI+) were recorded on a Waters LCT Premier Mass Spectrometer.

### 10:

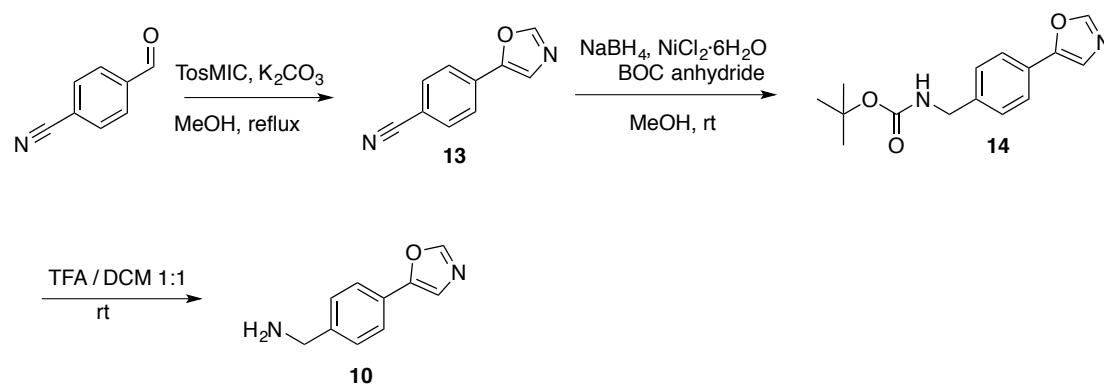

### 4-(Oxazol-5-yl)benzotrile, 13

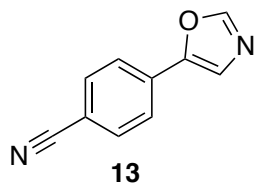

13 was synthesized as described previously <sup>2</sup>

### tert-Butyl 4-(oxazol-5-yl)benzylcarbamate, 14

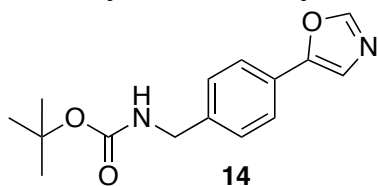

14 was synthesized as described previously <sup>2</sup>

### (4-(Oxazol-5-yl)phenyl)methanamine, 10

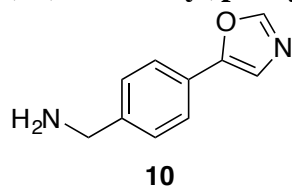

10 was synthesized as described previously <sup>2</sup>

2 / 5:

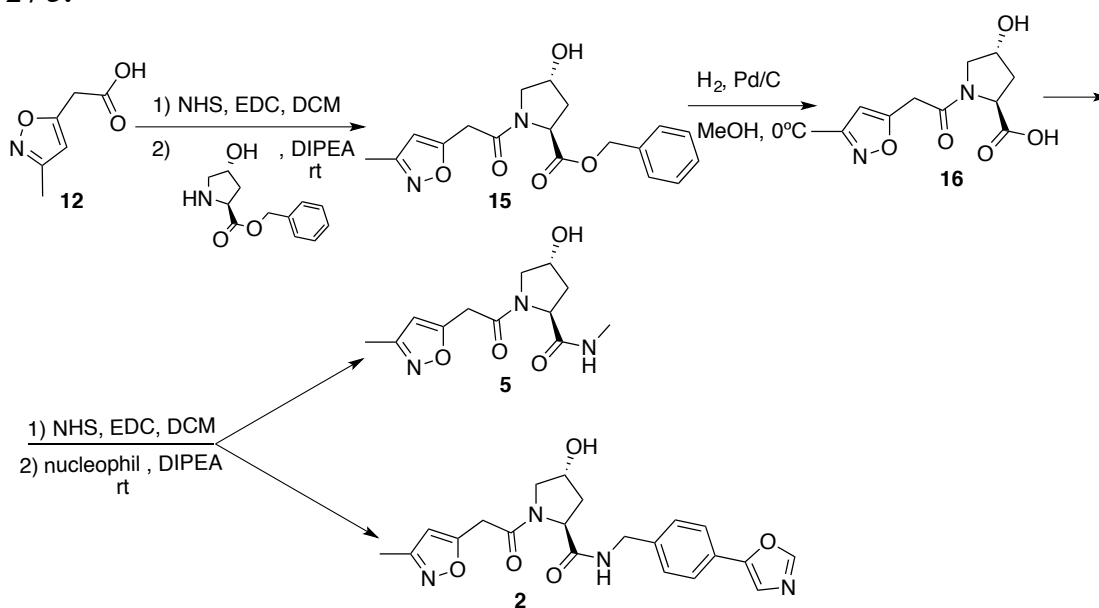

**(2*S*,4*R*)-benzyl-4-hydroxy-1-(2-(3-methylisoxazol-5-yl)acetyl)pyrrolidine-2-carboxylate, **15****

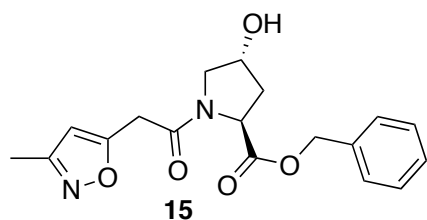

To a room temperature suspension of 2-(3-methylisoxazol-5-yl)acetic acid, **12** (1.0 g, 7.09 mmol, 1 eq.) in freshly distilled CH<sub>2</sub>Cl<sub>2</sub> (30 mL), under inert atmosphere (argon), were successively added *N*-hydroxysuccinimide (1.06 g, 9.21 mmol, 1.3 eq) and *N*-(3-Dimethylaminopropyl)-*N'*-ethylcarbodiimide hydrochloride (1.49 g, 7.80 mmol, 1.1 eq.). The resulting mixture was stirred at rt for 4.5 hours. (2*S*,4*R*)-benzyl 4-hydroxypyrrolidine-2-carboxylate hydrochloride (2.01 g, 7.80 mmol, 1.1 eq) and *N,N*-diisopropylethylamine (2.59 mL, 14.9 mmol, 2.1 eq.) were then added, and the resulting mixture was stirred at rt for 18 hours. The organic phase was washed with saturated aqueous NaHCO<sub>3</sub> (50 mL) and the phases were separated. The aqueous phase was extracted further with CHCl<sub>3</sub> (3 x 50 mL). The combined organic phases were dried (MgSO<sub>4</sub>) and concentrated *in vacuo*. The product **15** (1.85 g, 76%) was obtained as an amorphous off white solid after flash column chromatography (100% AcOEt). *R<sub>f</sub>* 0.3 (AcOEt); <sup>1</sup>H NMR (400 MHz, CDCl<sub>3</sub>, major rotamer) δ 2.00-2.07 (m, 1H), 2.20-2.32 (m, 4H), 3.16 (br. s, 1H), 3.57 (m, 1H), 3.70 (dd, *J* = 10.9, 4.6 Hz, 1H), 3.77 (s, 2H), 4.50 (m, 1H), 4.64 (app-t, *J* = 8.2 Hz, 1H), 5.11 (d, *J* = 12.2 Hz, 1H), 5.18 (d, *J* = 12.2 Hz, 1H), 6.10 (s, 1H), 7.29-7.36 (m, 5H). <sup>13</sup>C NMR (100 MHz, CDCl<sub>3</sub>, major rotamer) δ 11.4, 33.3, 37.6, 55.6, 58.0, 67.0, 70.0, 104.1, 128.1, 128.3, 128.5, 135.4, 160.2, 165.5, 166.1, 171.7. HRMS (ESI+) *m/z* calc. for C<sub>18</sub>H<sub>21</sub>N<sub>2</sub>O<sub>5</sub> [M+H]<sup>+</sup> 345.1445, found: 345.1474.

**(2*S*,4*R*)-4-hydroxy-1-(2-(3-methylisoxazol-5-yl)acetyl)-*N*-(4-(oxazol-5-yl)benzyl)pyrrolidine-2-carboxamide, **2****

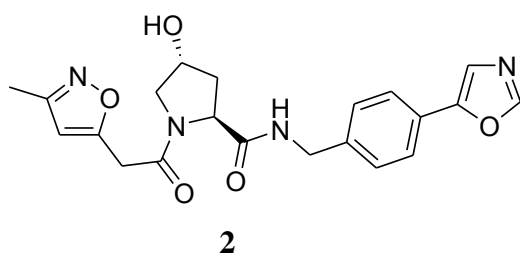

To a solution of (2*S*,4*R*)-benzyl 4-hydroxy-1-(2-(3-methylisoxazol-5-yl)acetyl)pyrrolidine-2-carboxylate, **15** (700 mg, 2.03 mmol, 1 eq.) in freshly distilled and degassed (bubbling with argon) MeOH (9.8 mL) at 0°C and under inert atmosphere (argon), was added 10% palladium on charcoal (107 mg, 0.102 mmol, 0.05 eq.). The resulting mixture was saturated with hydrogen (bubbling) and was stirred for 1.25 hour at 0°C under hydrogen atmosphere. The mixture was then degassed (bubbling with argon), filtered on celite and concentrated *in vacuo*. (2*S*,4*R*)-4-hydroxy-1-(2-(3-methylisoxazol-5-yl)acetyl)pyrrolidine-2-carboxylic acid, **16** was obtained as a white solid and used for the next step without further purification. A

small sample was purified by reverse phase HPLC (Gilson GX-271) for analysis and biophysical studies: Pursuit XRs C<sub>18</sub> (5 $\mu$ m; 250 21.2 mm)(Agilent), 5:95 to 60:40 MeCN/H<sub>2</sub>O over 25 minutes, RT = 13minutes. <sup>1</sup>H NMR (400 MHz, CD<sub>3</sub>OD, major rotamer)  $\delta$  2.05-2.15 (m, 1H), 2.25-2.35 (m, 4H), 3.62 (m, 1H), 3.77 (m, 1H), 3.92 (app-s., 2H), 4.48-4.53 (m, 2H), 6.23 (s, 1H). <sup>13</sup>C NMR (100 MHz, CD<sub>3</sub>OD, major rotamer)  $\delta$  11.2, 33.9, 38.8, 56.6, 59.4, 70.9, 105.3, 161.6, 167.6, 168.6, 175.4. HRMS (ESI+) m/z calc. for C<sub>11</sub>H<sub>15</sub>N<sub>2</sub>O<sub>5</sub> [M+H]<sup>+</sup> 255.0975, found: 255.0862.

To a room temperature suspension of (2*S*,4*R*)-4-hydroxy-1-(2-(3-methylisoxazol-5-yl)acetyl)pyrrolidine-2-carboxylic acid, **16** (2.03 mmol, 1 eq.) in CHCl<sub>3</sub> (14.9 mL), under inert atmosphere (argon), were successively added *N*-hydroxysuccinimide (304 mg, 2.64 mmol, 1.3 eq.) and *N*-(3-Dimethylaminopropyl)-*N'*-ethylcarbodiimide hydrochloride (428 mg, 2.23 mmol, 1.1 eq.). The resulting mixture was stirred at room temperature for 3 hours. (4-(oxazol-5-yl)phenyl)methanamine hydrochloride, **10** (471 mg, 2.23 mmol, 1.1 eq.) and *N,N*-diisopropylethylamine (742  $\mu$ L, 4.26 mmol, 2.1 eq.) were then added, and the resulting mixture was stirred at room temperature for 24 hours. The product partially precipitated as a white solid. A small amount of MeOH was added for complete solubilisation of the precipitate. The reaction mixture was diluted with CHCl<sub>3</sub> and washed with saturated aqueous NaHCO<sub>3</sub>. The aqueous phase was extracted 3 times with generous amounts of CHCl<sub>3</sub>. The combined organic phases were dried (MgSO<sub>4</sub>) and concentrated *in vacuo*. The product (648 mg, 78% from (2*S*,4*R*)-benzyl-4-hydroxy-1-(2-(3-methylisoxazol-5-yl)acetyl)pyrrolidine-2-carboxylate, **2**) was obtained as an amorphous white solid after flash column chromatography (gradient 95:5 to 90:10 CH<sub>2</sub>Cl<sub>2</sub>/MeOH). R<sub>f</sub> 0.3 (90:10 CH<sub>2</sub>Cl<sub>2</sub>/MeOH); <sup>1</sup>H NMR (400 MHz, CD<sub>3</sub>OD, major rotamer);  $\delta$  2.05-2.14 (m, 1H), 2.23-2.31 (m, 4H), 3.63 (m, 1H), 3.81 (m, 1H), 3.92 (d, *J* = 17.1 Hz, 1H), 3.97 (d, *J* = 17.1 Hz, 1H), 4.42 (d, *J* = 15.4 Hz, 1H), 4.48 (d, *J* = 15.4 Hz, 1H), 4.53 (m, 1H), 4.58 (m, 1H), 6.25 (s, 1H), 7.43 (m, 2H), 7.50 (s, 1H), 7.70 (m, 2H), 8.25 (s, 1H). <sup>13</sup>C NMR (100 MHz, CD<sub>3</sub>OD, major rotamer)  $\delta$  11.3, 34.0, 39.4, 43.8, 57.0, 60.8, 70.9, 105.4, 121.9, 125.7, 127.8, 129.1, 140.8, 152.8, 153.2, 161.6, 167.7, 168.8, 174.5. HRMS (ESI+) m/z calc. for C<sub>21</sub>H<sub>23</sub>N<sub>4</sub>O<sub>5</sub> [M+H]<sup>+</sup> 411.1663, found: 411.1705.

**(2*S*,4*R*)-4-hydroxy-*N*-methyl-1-(2-(3-methylisoxazol-5-yl)acetyl)pyrrolidine-2-carboxamide, **5****

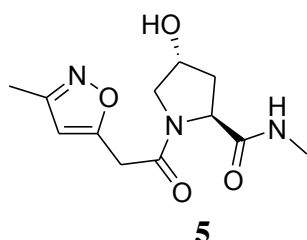

To a room temperature suspension of (2*S*,4*R*)-4-hydroxy-1-(2-(3-methylisoxazol-5-yl)acetyl)pyrrolidine-2-carboxylic acid, **16** (0.48 mmol, 1 eq.) in CHCl<sub>3</sub> (3.2 mL), under inert atmosphere (argon), were successively added *N*-hydroxysuccinimide (65 mg, 0.57 mmol, 1.3 eq.) and *N*-(3-Dimethylaminopropyl)-*N'*-ethylcarbodiimide hydrochloride (92 mg, 0.48 mmol, 1.1 eq.). The resulting mixture was stirred at room temperature for 3 hours. Methylamine (8M in EtOH, 82  $\mu$ L, 0.65 mmol, 1.5 eq.) and *N,N*-diisopropylethylamine (91  $\mu$ L, 0.52 mmol, 1.2 eq.) were then

added, and the resulting mixture was stirred at room temperature for 24 hours. The reaction mixture was concentrated *in vacuo* and the product, **5** (64 mg, 55% from (2*S*,4*R*)-benzyl-4-hydroxy-1-(2-(3-methylisoxazol-5-yl)acetyl)pyrrolidine-2-carboxylate, **15**) was obtained as an amorphous white solid after flash column chromatography (gradient 95:5 to 90:10 CH<sub>2</sub>Cl<sub>2</sub>/MeOH). *R<sub>f</sub>* 0.25 (90:10 CH<sub>2</sub>Cl<sub>2</sub>/MeOH); <sup>1</sup>H NMR (400 MHz, CD<sub>3</sub>OD, major rotamer); δ 1.98-2.08 (m, 1H), 2.18-2.28 (m, 4H), 2.73 (s, 3H), 3.61 (m, 1H), 3.78 (m, 1H), 3.89 (d, *J* = 17.1 Hz, 1H), 3.93 (d, *J* = 17.1 Hz, 1H), 4.44-4.52 (m, 2H), 6.23 (s, 1H). <sup>13</sup>C NMR (100 MHz, CD<sub>3</sub>OD, major rotamer) δ 11.3, 26.4, 34.0, 39.4, 57.0, 60.7, 70.9, 105.4, 161.6, 167.7, 168.7, 174.9. HRMS (ESI+) *m/z* calc. for C<sub>12</sub>H<sub>18</sub>N<sub>3</sub>O<sub>4</sub> [M+H]<sup>+</sup> 268.1292, found: 268.1302.

**9:**

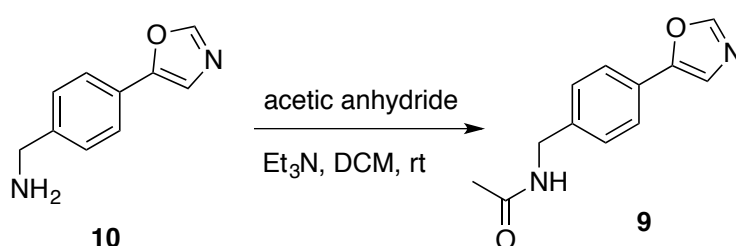

**N-(4-(Oxazol-5-yl)benzyl)acetamide, 9**

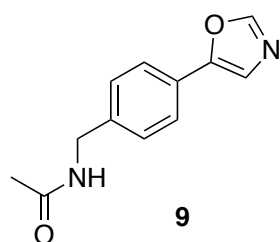

**9** was synthesized as described previously <sup>2</sup>

**18:**

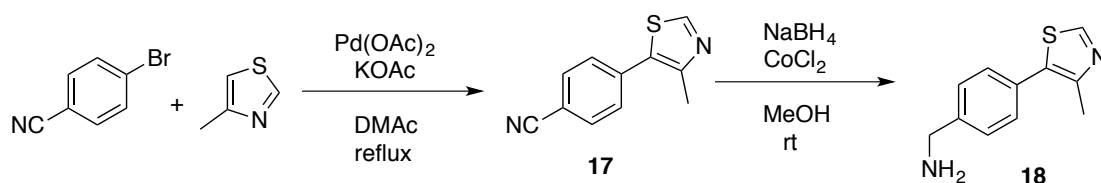

**4-(4-methylthiazol-5-yl)benzonitrile, 17**

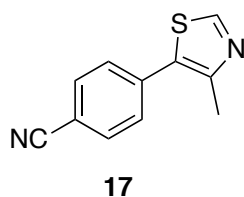

**17** was synthesized as described previously <sup>3</sup>

**(4-(4-methylthiazol-5-yl)phenyl)methanamine, 18**

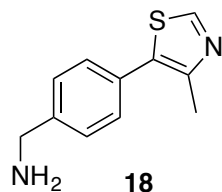

**18** was synthesized as described previously <sup>3</sup>

**8:**

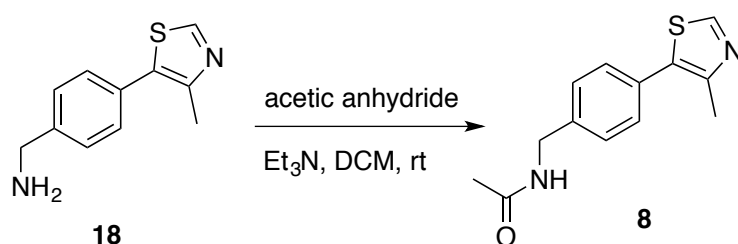

**N-(4-(4-methylthiazol-5-yl)benzyl)acetamide, 8**

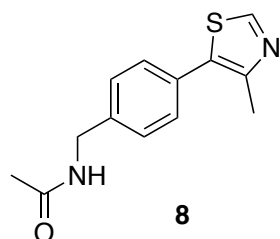

To a room temperature suspension of (4-(4-methylthiazol-5-yl)phenyl)methanamine, **18** (100 mg, 0.49 mmol, 1 eq.) in CH<sub>2</sub>Cl<sub>2</sub> (6 mL) under inert atmosphere (argon), was added triethylamine (147  $\mu$ L, 107 mg, 1.06 mmol). The resulting mixture was stirred at room temperature for 10 minutes. Anhydride acetic was added dropwise and the resulting mixture was stirred at room temperature for 18 hours. The reaction was quenched with 10% HCl (5 mL) and the aqueous layer was extracted with CH<sub>2</sub>Cl<sub>2</sub> (3x10 mL). The combined organic layers were dried (MgSO<sub>4</sub>) and concentrated *in vacuo* to give the product **8** (99 mg, 82% isolated) as a yellow pale solid after flash column chromatography (gradient 100 CH<sub>2</sub>Cl<sub>2</sub> to 97:3 CH<sub>2</sub>Cl<sub>2</sub>/MeOH). *R<sub>f</sub>* 0.73 (90:10 CH<sub>2</sub>Cl<sub>2</sub>/MeOH). <sup>1</sup>H NMR (400 MHz, CD<sub>3</sub>OD)  $\delta$  2.00 (s, 3H), 2.47 (s, 3H), 4.40 (s, 2H), 7.38-7.45 (m, 4H), 8.87 (s, 1H). <sup>13</sup>C NMR (100 MHz, CD<sub>3</sub>OD)  $\delta$  15.7, 22.5, 43.8, 129.1, 130.5, 131.7, 133.3, 140.4, 149.1, 151.2, 173.2. HRMS (ESI+) *m/z* calc. for C<sub>13</sub>H<sub>15</sub>N<sub>2</sub>OS [M+H]<sup>+</sup> 247.0905, found: 247.0901.

1:

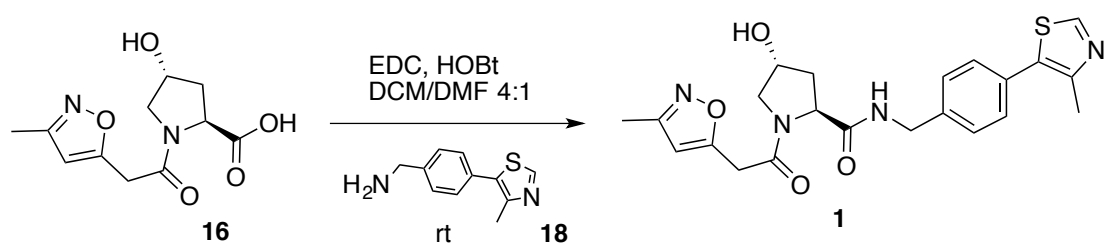

**(2*S*,4*R*)-4-hydroxy-1-(2-(3-methylisoxazol-5-yl)acetyl)-*N*-(4-(4-methylthiazol-5-yl)benzyl)pyrrolidine-2-carboxamide, 1**

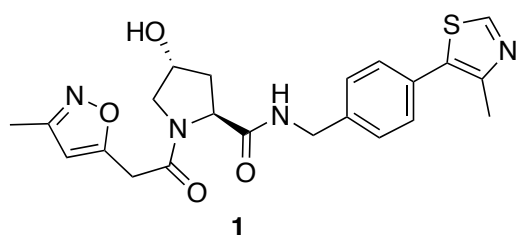

To a room temperature suspension of (2*S*,4*R*)-4-hydroxy-1-(2-(3-methylisoxazol-5-yl)acetyl)pyrrolidine-2-carboxylic acid, **16** (66 mg, 0.25 mmol), 1 eq. in CH<sub>2</sub>Cl<sub>2</sub>:DMF 4:1 (3 mL) under inert atmosphere (argon), were successively added 1-hydroxybenzotriazole (60 mg, 0.39 mmol, 1.5 eq.) and *N*-(3-dimethylaminopropyl)-*N'*-ethylcarbodiimide hydrochloride (65 mg, 0.34 mmol, 1.3 eq.). The resulting mixture was stirred at room temperature for 5 minutes. (4-(4-methylthiazol-5-yl)phenyl)methanamine, **18** (54 mg, 0.26 mmol, 1 eq.) dissolved in CH<sub>2</sub>Cl<sub>2</sub>:DMF 4:1 (2 mL) was added. Upon stirring for 15 h the reaction was diluted with 10 mL CH<sub>2</sub>Cl<sub>2</sub>, and washed with 15 mL sat. NaHCO<sub>3</sub> (x3). The organic layer was dried (MgSO<sub>4</sub>) and concentrated *in vacuo* to give the product **1** (49 mg, 43% isolated) as a white solid after flash column chromatography (gradient 97:3 to 95:5 CH<sub>2</sub>Cl<sub>2</sub>/MeOH) that matched the reported spectral data.<sup>3</sup> *R<sub>f</sub>* 0.46 (90:10 CH<sub>2</sub>Cl<sub>2</sub>/MeOH) HRMS (ESI+) *m/z* calc. for C<sub>22</sub>H<sub>24</sub>N<sub>4</sub>O<sub>4</sub>S [M+H]<sup>+</sup> 441.1597, found: 441.1632.

3:

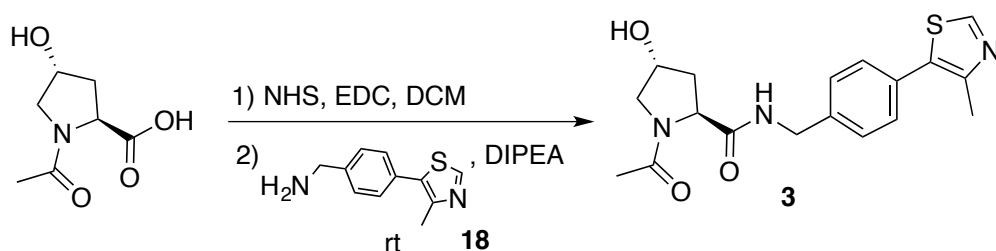

**(2*S*,4*R*)-1-acetyl-4-hydroxy-*N*-(4-(4-methylthiazol-5-yl)benzyl)pyrrolidine-2-carboxamide, 3**



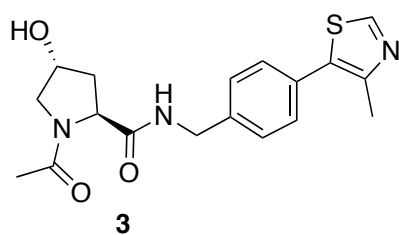

To a room temperature suspension of (2*S*,4*R*)-1-acetyl-4-hydroxypyrrolidine-2-carboxylic acid (200 mg, 1.15 mmol, 1 eq.) in CH<sub>2</sub>Cl<sub>2</sub> (3 mL), under inert atmosphere (argon), were successively added *N*-hydroxysuccinimide (172 mg, 1.50 mmol, 1.3 eq.) and *N*-(3-Dimethylaminopropyl)-*N'*-ethylcarbodiimide hydrochloride (241 mg, 1.26 mmol, 1.1 eq.). The resulting mixture was stirred at room temperature for 3 hours. (4-(4-methylthiazol-5-yl)phenyl)methanamine, **18** (283 mg, 1.38 mmol, 1.2 eq.) dissolved with CH<sub>2</sub>Cl<sub>2</sub> (2 mL) and *N,N*-diisopropylethylamine (91 μL, 0.523 mmol, 1.2 eq.) were then added, and the resulting mixture was stirred at room temperature for 18 hours. The reaction mixture was diluted with CH<sub>2</sub>Cl<sub>2</sub> (5 mL) and washed with saturated aqueous NaHCO<sub>3</sub> (10 mL) and extracted with CH<sub>2</sub>Cl<sub>2</sub> (3x10 mL). The combined organic phases were dried (MgSO<sub>4</sub>) and concentrated *in vacuo* to give the product **3** (133 mg, 32% isolated) as a white solid after flash column chromatography (gradient 97:3 to 95:5 CH<sub>2</sub>Cl<sub>2</sub>/MeOH). *R<sub>f</sub>* 0.25 (90:10 CH<sub>2</sub>Cl<sub>2</sub>/MeOH). <sup>1</sup>H NMR (400 MHz, CD<sub>3</sub>OD) δ 2.05-2.12 (m, 4H) 2.22-2.30 (m, 1H), 2.48 (s, 3H), 3.55 (d, *J* = 11.2 Hz, 1H), 3.79 (dd, *J* = 4, 4.4 Hz, 1H), 4.35-4.58 (m, 4H), 7.37-7.47 (m, 4H), 8.87 (s, 1H) <sup>13</sup>C NMR (101 MHz, CD<sub>3</sub>OD, major rotamer) δ 15.8, 22.4, 39.6, 43.6, 57.4, 60.4, 70.8, 128.9, 130.4, 131.3, 140.3, 152.8, 172.6, 174.7. HRMS (ESI+) *m/z*. calc. for C<sub>18</sub>H<sub>21</sub>N<sub>3</sub>O<sub>3</sub>S [M+H]<sup>+</sup> 360.1382, found: 360.1398.

### (2*S*,4*R*)-1-Acetyl-4-hydroxy-*N*-methylpyrrolidine-2-carboxamide, **6**

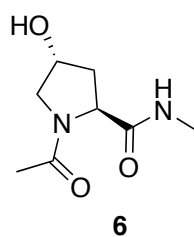

**6** was synthesized as described previously <sup>1</sup>

### 3- NMR experiments

All ligand-based NMR experiments were carried out at 278 K using Bruker Avance 500 MHz with TCI cryoprobe. Protein-based <sup>1</sup>H-<sup>15</sup>N 2D NMR HSQC (correlation via double inept transfer, phase sensitive and with decoupling during acquisition) were performed at 305 K on Bruker Avance 700 MHz with TCI cryoprobe (Department of Chemistry, University of Cambridge). <sup>1</sup>H-<sup>15</sup>N 2D NMR HSQC spectra were performed with 64 scans for each of 256 points in indirect dimension and relaxation delay of 1 s that summed up to 5 h of experiment time for each protein spectrum and titration.

All samples for ligand-based NMR experiments were made up to 200  $\mu$ l in 3 mm capillaries containing 50 mM NaPO<sub>4</sub> pH 7.0, 10% (v/v) D<sub>2</sub>O and 20  $\mu$ M (trimethylsilyl)-propionic acid-*d*<sub>4</sub> (TSP), for calibration purposes. For each set-up three experiments were carried out: 1) control sample – compound alone; 2) + protein sample – protein concentration varies from 10 to 40  $\mu$ M; and 3) + protein + peptide – same as previous experiment but with the addition of 100  $\mu$ M HIF-1 $\alpha$  19-mer peptide (DEALA-Hyp-YIPMDDDFQLRSF).

Protein-based NMR samples were made up to 200  $\mu$ l in 3 mm capillaries in 20 mM Bis-Tris pH 7.0, 150 mM NaCl, 1 mM DTT and using 10% (v/v) D<sub>2</sub>O. To titrate compounds into <sup>15</sup>N-labeled protein, 100 mM stocks in 100% *d*<sub>6</sub>-DMSO were used in order to have significant less dilution and protein consumption.

NMR experiments are shown in the Figures S1-S13.

#### 4 - X-ray diffraction experiments

The X-ray data collection and statistics for VCB crystals soaked with **2** (pdb code 3zrc) and **6** (pdb code 4awj) have been described previously.<sup>1,2</sup>

In order to collect data for the **4** and **5** bound VCB complexes, VCB crystals were soaked overnight in a 20 mM solution of **4** or **5**, in Na cacodylate pH 6.0, 15% PEG3350, 0.2 M Mg acetate, 5 mM DTT. X-ray data were collected at 100 K at the Diamond synchrotron facilities and processed using XDS. The structures were solved by rigid body refinement using Buster TNT<sup>4</sup> using the VCB apo structure (PDB code 3zrf)<sup>1</sup> as a starting model. The initial structure obtained this way was further refined using Buster TNT and corrected manually using Coot.<sup>5</sup> Data collection statistics and refinement parameters are summarized in **Table S1**.

**Table S1.** Data collection statistics and refinement parameters for VCB\_4 and VCB\_5 crystal structures

| Dataset                                                                    | VCB_4                   | VCB_5                   |
|----------------------------------------------------------------------------|-------------------------|-------------------------|
| <b>Data collection</b>                                                     |                         |                         |
| Synchrotron                                                                | Diamond Light Source    | Diamond Light Source    |
| Beamline                                                                   | I02                     | I02                     |
| Wavelength, Å                                                              | 0.9795                  | 0.9795                  |
| <b>Data processing</b>                                                     |                         |                         |
| Space group                                                                | P4 <sub>1</sub> 22 (91) | P4 <sub>1</sub> 22 (91) |
| Cell parameters - <i>a, b, c</i> (Å)<br>( $\alpha=\beta=\gamma=90^\circ$ ) | 93.66 93.66 365.92      | 93.66 93.66 365.92      |
| Resolution, Å (outer shell) <sup>(c)</sup>                                 | 50.0-2.2 (2.3-2.2)      | 50.0-2.35 (2.45-2.35)   |
| Total reflections                                                          | 1073860 (77623)         | 878250 (64565)          |
| No. of unique reflections                                                  | 83354 (6032)            | 68245 (4935)            |

|                                             |              |              |
|---------------------------------------------|--------------|--------------|
| Completeness                                | 100 (100)    | 100 (100)    |
| Multiplicity                                | 12.9 (12.9)  | 12.9 (13.1)  |
| $R_{\text{meas}}, \%$ (outer shell)         | 11.8 (163.8) | 14.6 (185.2) |
| $CC_{1/2}, \%$ (outer shell)                | 99.9 (81.8)  | 99.8 (94.0)  |
| $\langle I/\sigma(I) \rangle$ (outer shell) | 14.95 (2.18) | 15.87 (2.22) |
| Mosaicity, $^{\circ}$                       | 0.09         | 0.241        |
| <b>Refinement</b>                           |              |              |
| Resolution range, $\text{\AA}$              | 46.79-2.20   | 46.59-2.35   |
| No. of reflections                          | 83335        | 68204        |
| Percentage observed                         | 99.98        | 99.98        |
| $R_{\text{cryst}},^{(a)} \%$                | 20.66        | 19.02        |
| $R_{\text{free}},^{(b)} \%$                 | 24.62        | 22.75        |
| <b>RMS</b>                                  |              |              |
| Bonds, $\text{\AA}$                         | 1.17         | 1.19         |
| Angles, $^{\circ}$                          | 0.01         | 0.01         |
| <b>Ramachandran Plot</b>                    |              |              |
| Most favored, $\%$                          | 95.42        | 94.61        |
| Additionally allowed, $\%$                  | 3.34         | 3.16         |
| Disallowed, $\%$                            | 1.24         | 2.23         |
| <b>PDB code</b>                             | 4bks         | 4bkt         |

<sup>(a)</sup>  $R_{\text{cryst}} = \sum ||F_{\text{obs}}| - |F_{\text{calc}}|| / \sum |F_{\text{obs}}|$ ,  $F_{\text{obs}}$  and  $F_{\text{calc}}$  are observed and calculated structure factor amplitudes

<sup>(b)</sup>  $R_{\text{free}}$  as for  $R_{\text{cryst}}$  using a random subset of the data excluded from the refinement

<sup>(c)</sup> Data in brackets are for the highest resolution shell

## 5 - ITC experiments

ITC experiments were performed using the ITC<sub>200</sub> instrument from Microcal Inc. (GE Healthcare) at 25°C. VCB protein was in 20 mM Bis-Tris pH 7.0, 150 mM NaCl, 1 mM DTT and loaded into the ITC cell at concentration of 80  $\mu\text{M}$  with the appropriate v/v DMSO solution. Ligands were dissolved in the same buffer/DMSO percentage. Typically, 19 injections of 2.0  $\mu\text{L}$  of ligand solution of 4 s duration at 1 min intervals were performed. An initial injection of ligand (0.5  $\mu\text{L}$ ) was made and discarded during data analysis. Data was fitted to single binding site model using the Microcal LLC ITC<sub>200</sub> Origin software provided by the manufacturer.

ITC traces together with the results of the data fitting are shown in the Figures S1-S13.

## 6 - Figures

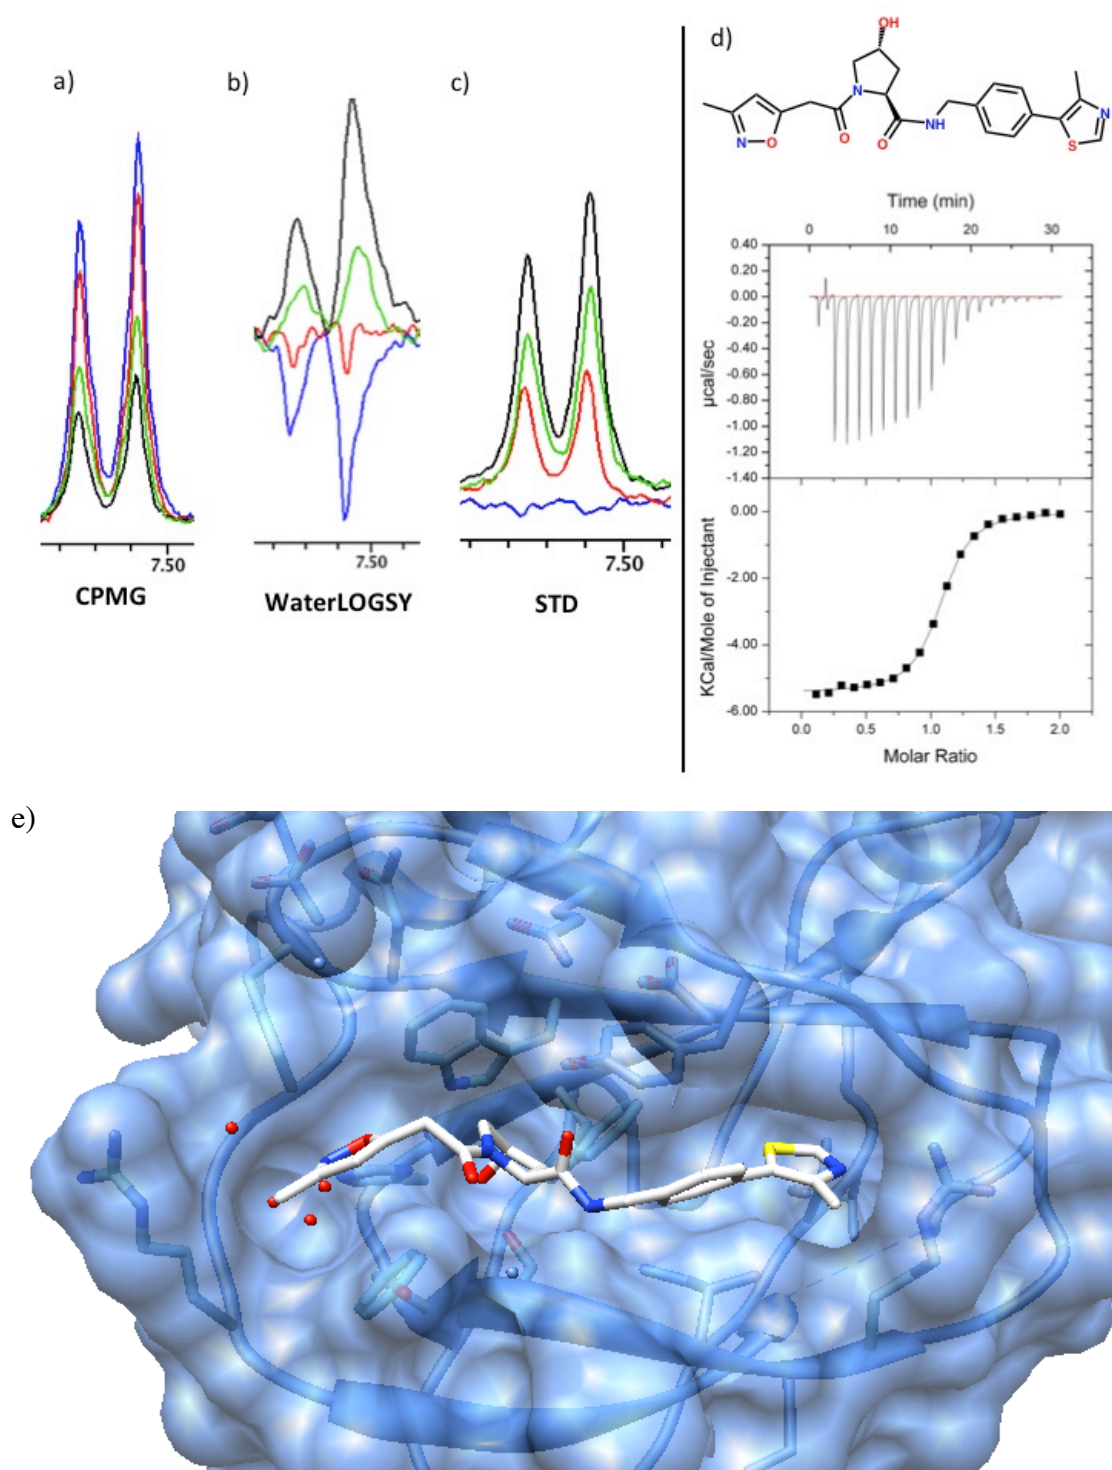

**Figure S1:** Binding detection using ligand-based NMR spectroscopy for **1**. Panels a), b) and c) depict spectra for VCB+**1** using set-ups 1 and 2 (red and black respectively), the compound alone (blue) and in competition with 100 μM 19-mer HIF-1α peptide under set-up 2 (green). d) Direct ITC titration for **1** (1 mM compound and 100 μM VCB).  $K_a = 6.3 \times 10^5 \pm 3.5 \times 10^4 \text{ M}^{-1}$ ;  $\Delta H = -5435 \pm 25 \text{ cal/mol}$  and  $\Delta S = 8.3 \text{ cal/mol/degree}$ . e) Modeled bound **1** (white carbon sticks) into VCB structure. The protein surface is shown in blue at 30% transparency.

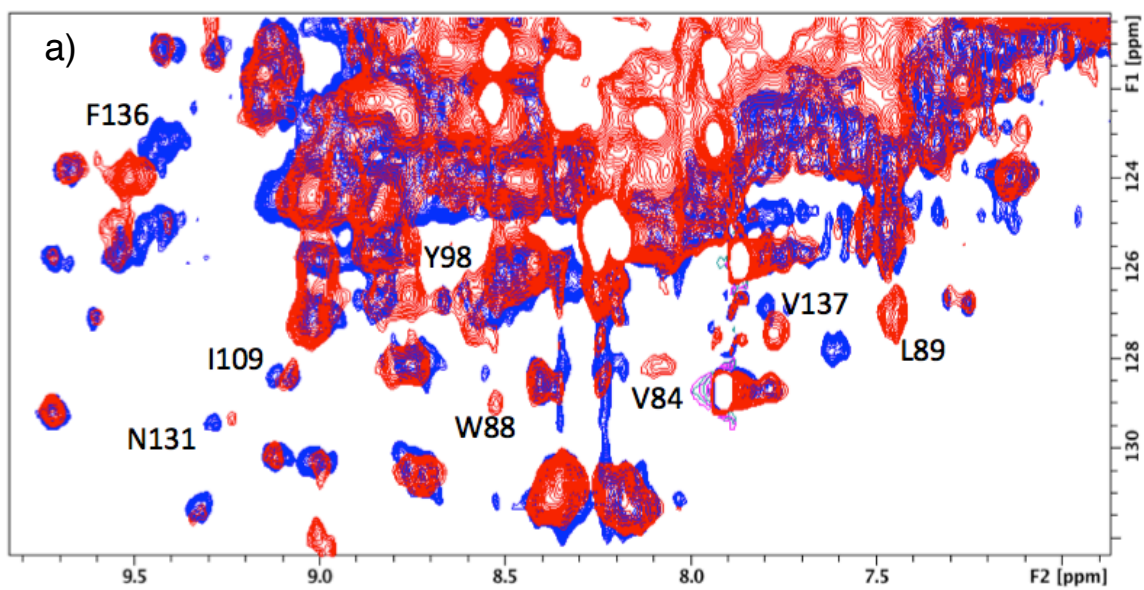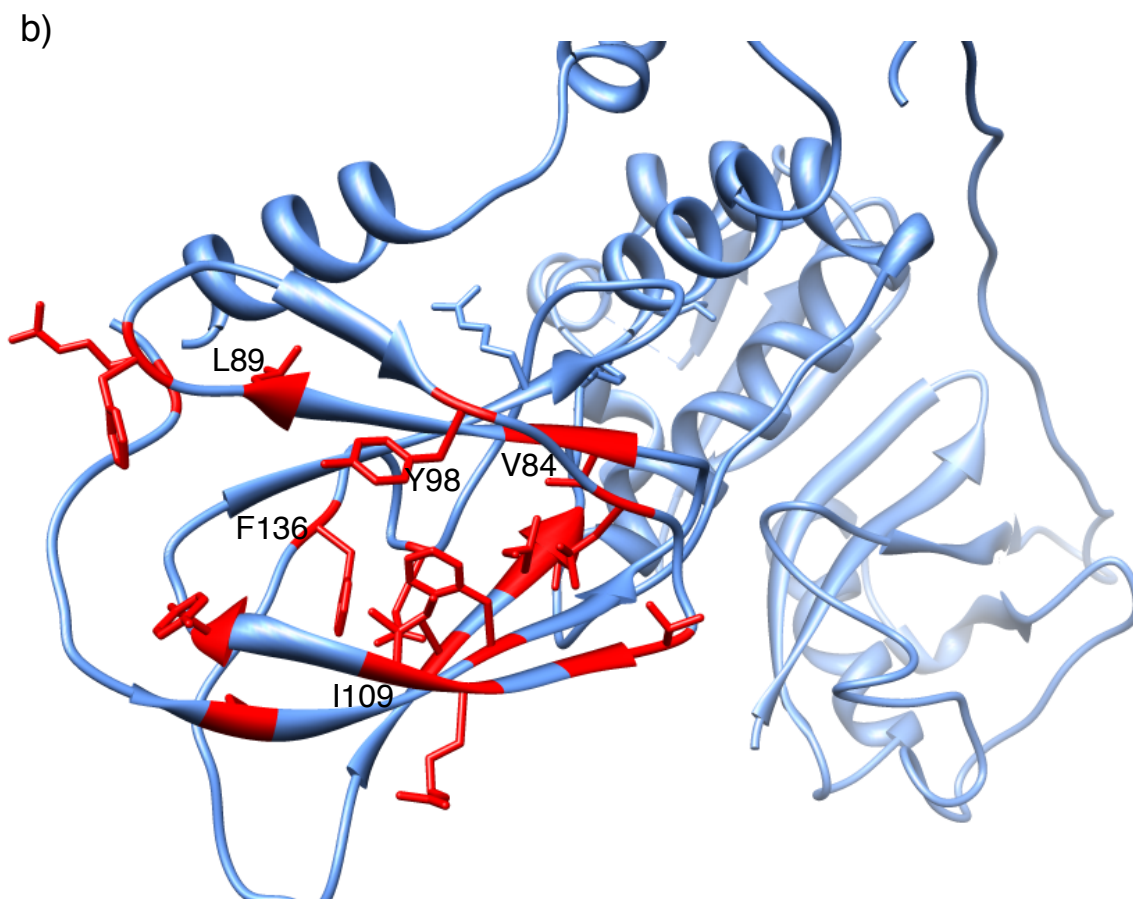

**Figure S2:** a) Zoom on the 2D  $^1\text{H}$ - $^{15}\text{N}$  HSQC spectrum of 100  $\mu\text{M}$  VCB (red) highlighting the residues shifting due the protein-ligand interaction with 1 mM concentration of **1** (blue). b) Site specific mapping into the VCB structure of the residues involved in the interaction (red).

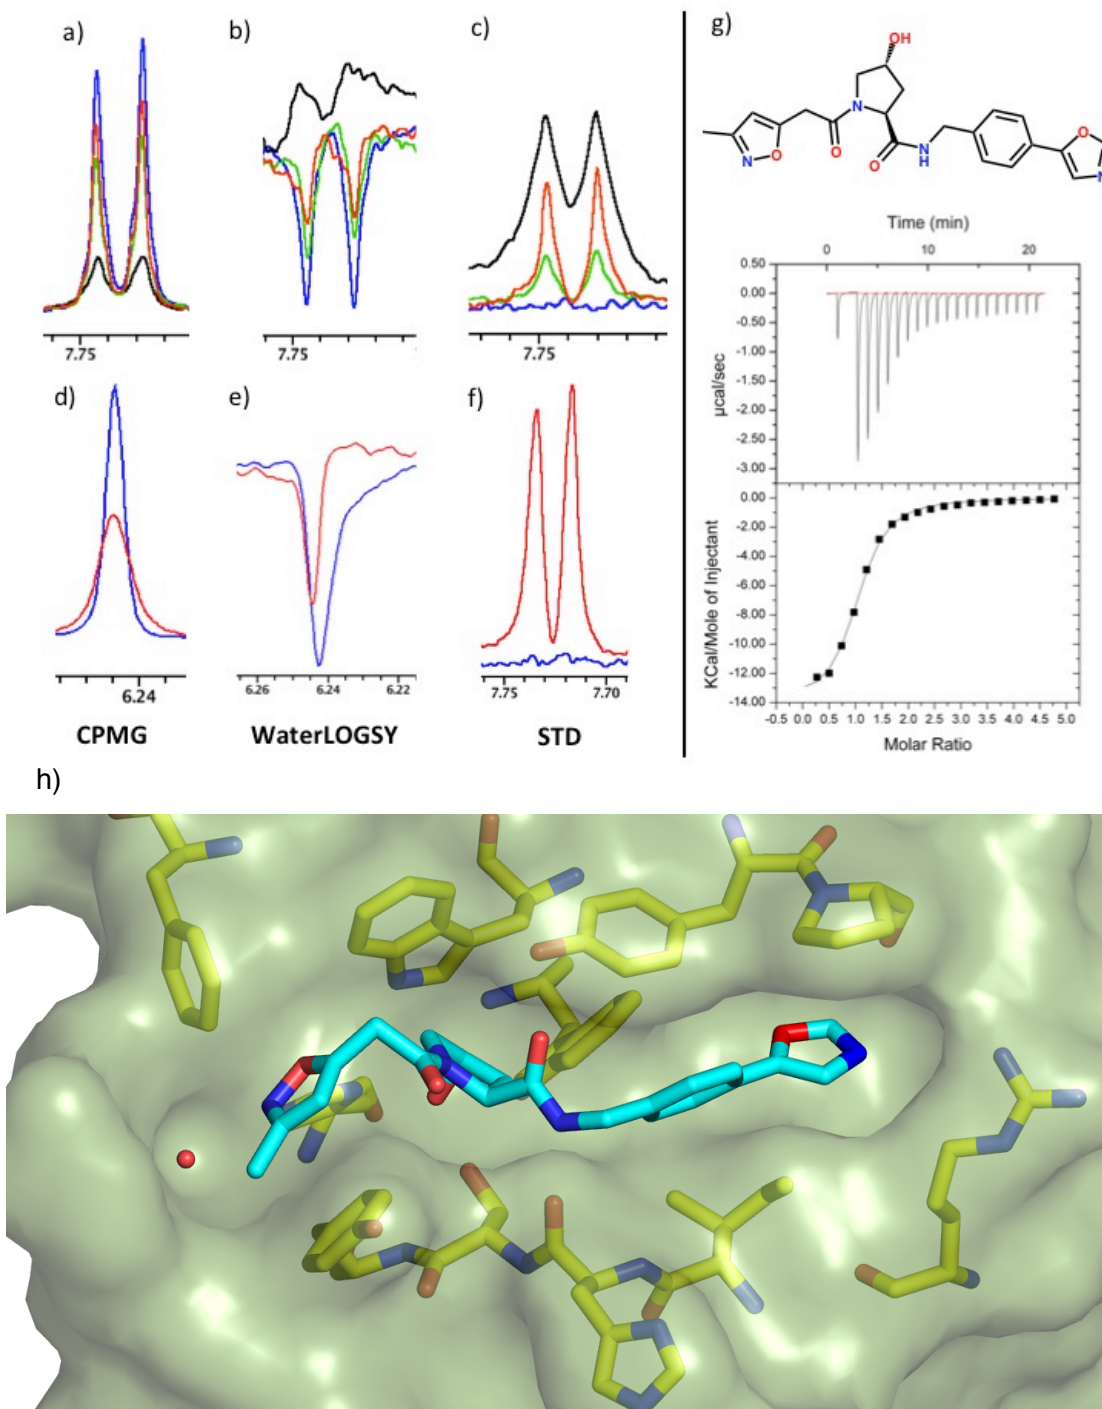

**Figure S3:** Binding detection using ligand-based NMR spectroscopy for **2**. Panels a), b) and c) depict spectra for VCB+**2** using set-ups 1 and 2 (red and black respectively), the compound alone (blue) and in competition with 100  $\mu\text{M}$  19-mer HIF-1 $\alpha$  peptide under set-up 2 (green). Panels d), e) and f) depict spectra for VCB+**2** using set-up 3 (red) and compound alone (blue). g) Direct ITC titration for **2** (1 mM compound and 100  $\mu\text{M}$  VCB).  $K_a = 1.8 \times 10^5 \pm 3.0 \times 10^4 \text{ M}^{-1}$ ;  $\Delta H = -12150 \pm 671 \text{ cal/mol}$  and  $\Delta S = -16.7 \text{ cal/mol/degree}$ . h) Crystal structure of VCB in complex with **2** (cyan carbon sticks).<sup>1</sup> The protein surface is shown in green at 40% transparency.

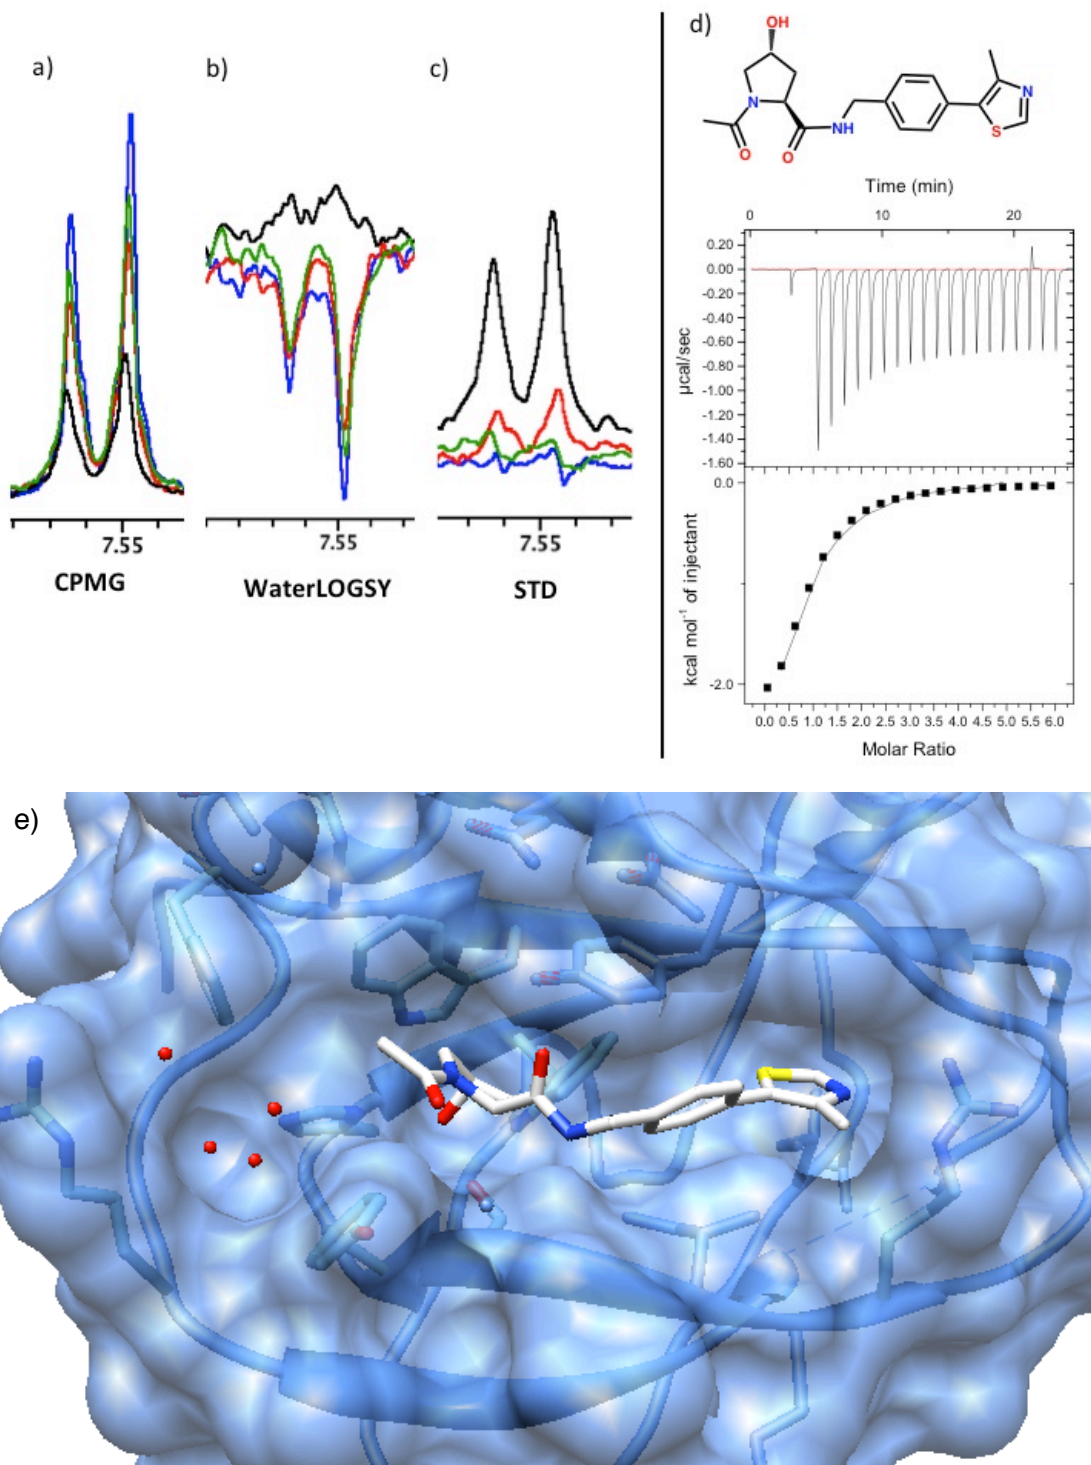

**Figure S4:** Binding detection using ligand-based NMR spectroscopy for **3**. Panels a), b) and c) depict spectra for VCB+**3** using set-ups 1 and 2 (red and black respectively), the compound alone (blue) and in competition with 100  $\mu\text{M}$  19-mer HIF-1 $\alpha$  peptide under set-up 2 (green). d) Direct ITC titration for **3** (3 mM compound and 100  $\mu\text{M}$  VCB).  $K_a = 2.7 \times 10^4 \pm 5.4 \times 10^3 \text{ M}^{-1}$ ;  $\Delta H = -3200 \pm 472 \text{ cal/mol}$  and  $\Delta S = 6.4 \text{ cal/mol/degree}$ . e) Modeled bound **3** (white carbon sticks) into VCB structure. The protein surface is shown in blue at 30% transparency.

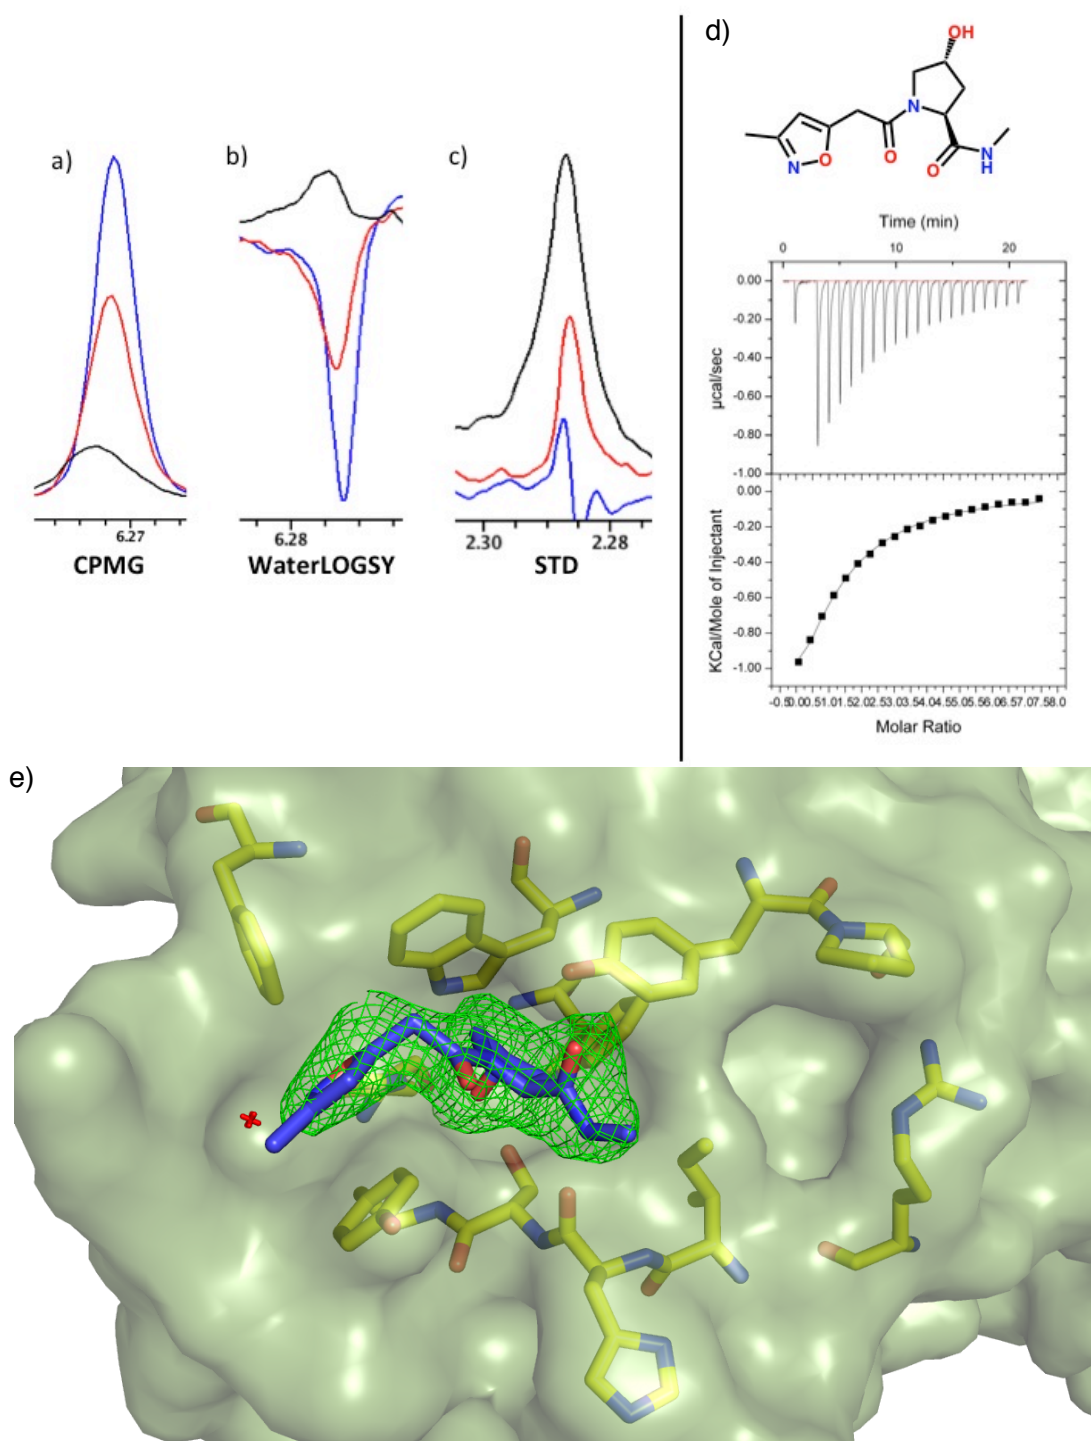

**Figure S5:** Binding detection using ligand-based NMR spectroscopy for **5**. Panels a), b) and c) depict spectra for VCB+**5** using set-ups 1 and 2 (red and black respectively), the compound alone (blue). d) Direct ITC titration for **5** (3 mM compound and 100 µM VCB).  $K_a = 4.17 \times 10^3 \pm 293 \text{ M}^{-1}$ ;  $\Delta H = -2555 \pm 259 \text{ cal/mol}$  and  $\Delta S = 8.0 \text{ cal/mol/degree}$ . e) Crystal structure of VCB in complex with **5** (blue carbon sticks). The omit electron density maps ( $F_o - F_c$ ) is shown in green contoured at  $2.5\sigma$  around the ligand. The protein surface is shown in green at 40% transparency.



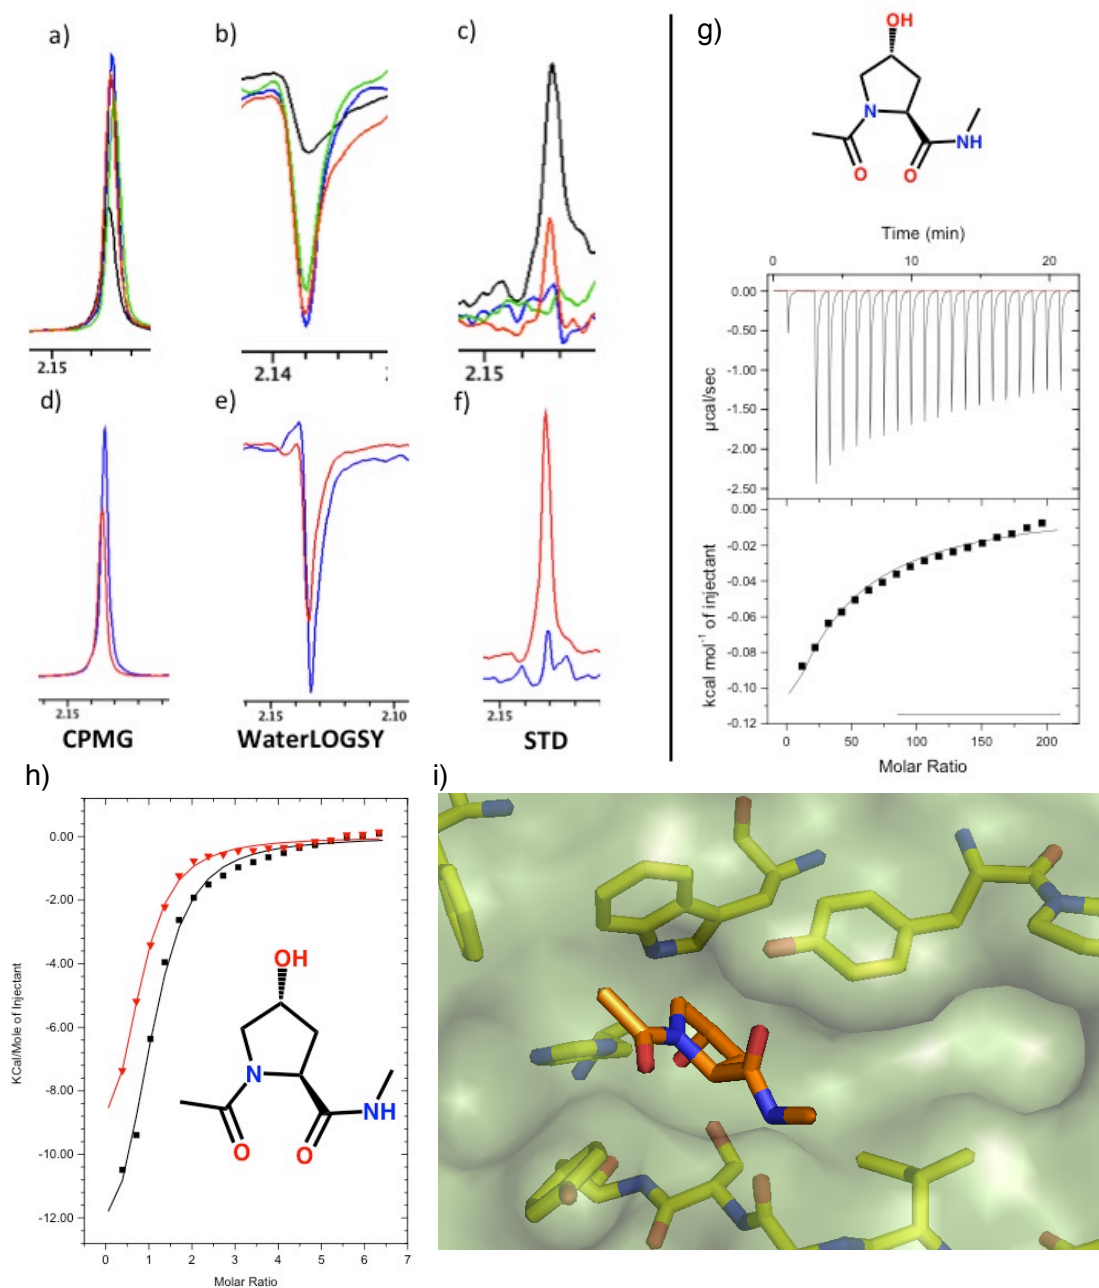

**Figure S6:** Binding detection using ligand-based NMR spectroscopy for **6**. Panels a), b) and c) depict spectra for VCB+**6** using set-ups 1 and 2 (red and black respectively), the compound alone (blue) and in competition with 100  $\mu$ M 19-mer HIF-1 $\alpha$  peptide under set-up 2 (green). Panels d), e) and f) depict spectra for VCB+**6** using set-up 3 (red) and compound alone (blue). g) Direct ITC titration for **6** (60 mM compound and 100  $\mu$ M VCB).  $K_a = 204 \pm 19.7 \text{ M}^{-1}$ ;  $\Delta H = -2415 \pm 153 \text{ cal/mol}$  and  $\Delta S = -16.7 \text{ cal/mol/degree}$ . h) Competitive ITC titration between **2** and **6**. Direct titration of **2** into 100  $\mu$ M VCB is shown in the absence (black trace) and presence (red trace) of 3 mM of **6**. i) Crystal structure of VCB in complex with **2** (orange carbon sticks).<sup>2</sup> The protein surface is shown in green at 40% transparency.

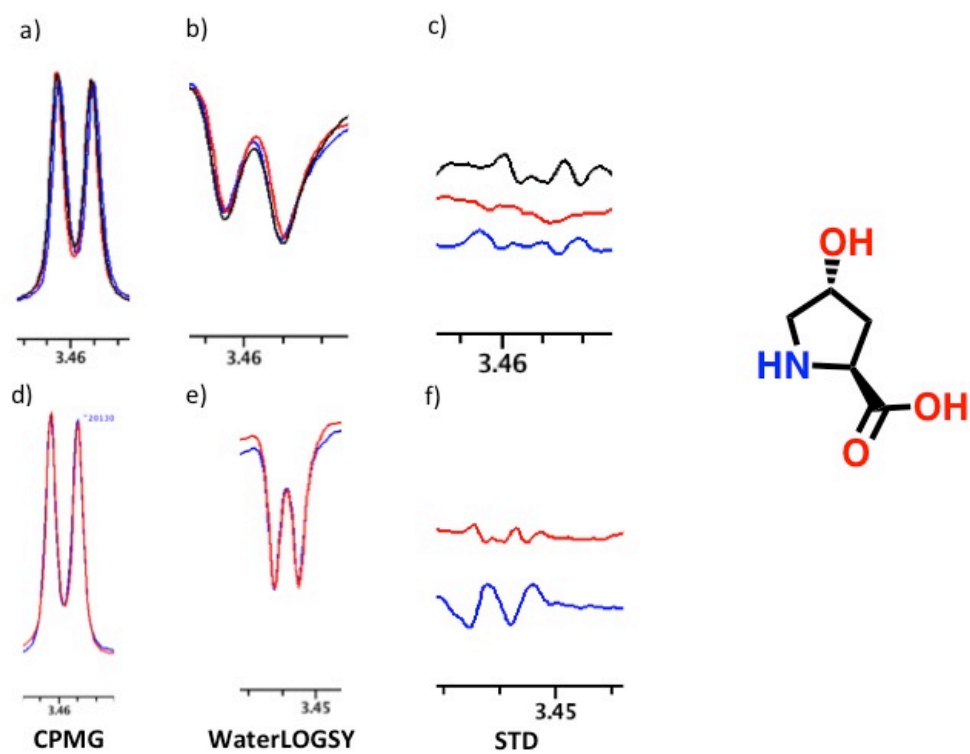

**Figure S7:** Binding detection using ligand-based NMR spectroscopy for **7**. Panels a), b) and c) depict spectra for VCB+**7** using set-ups 1 and 2 (red and black respectively) and the compound alone (blue). Panels d), e) and f) depict spectra for VCB+**7** using set-up 3 (red) and compound alone (blue).

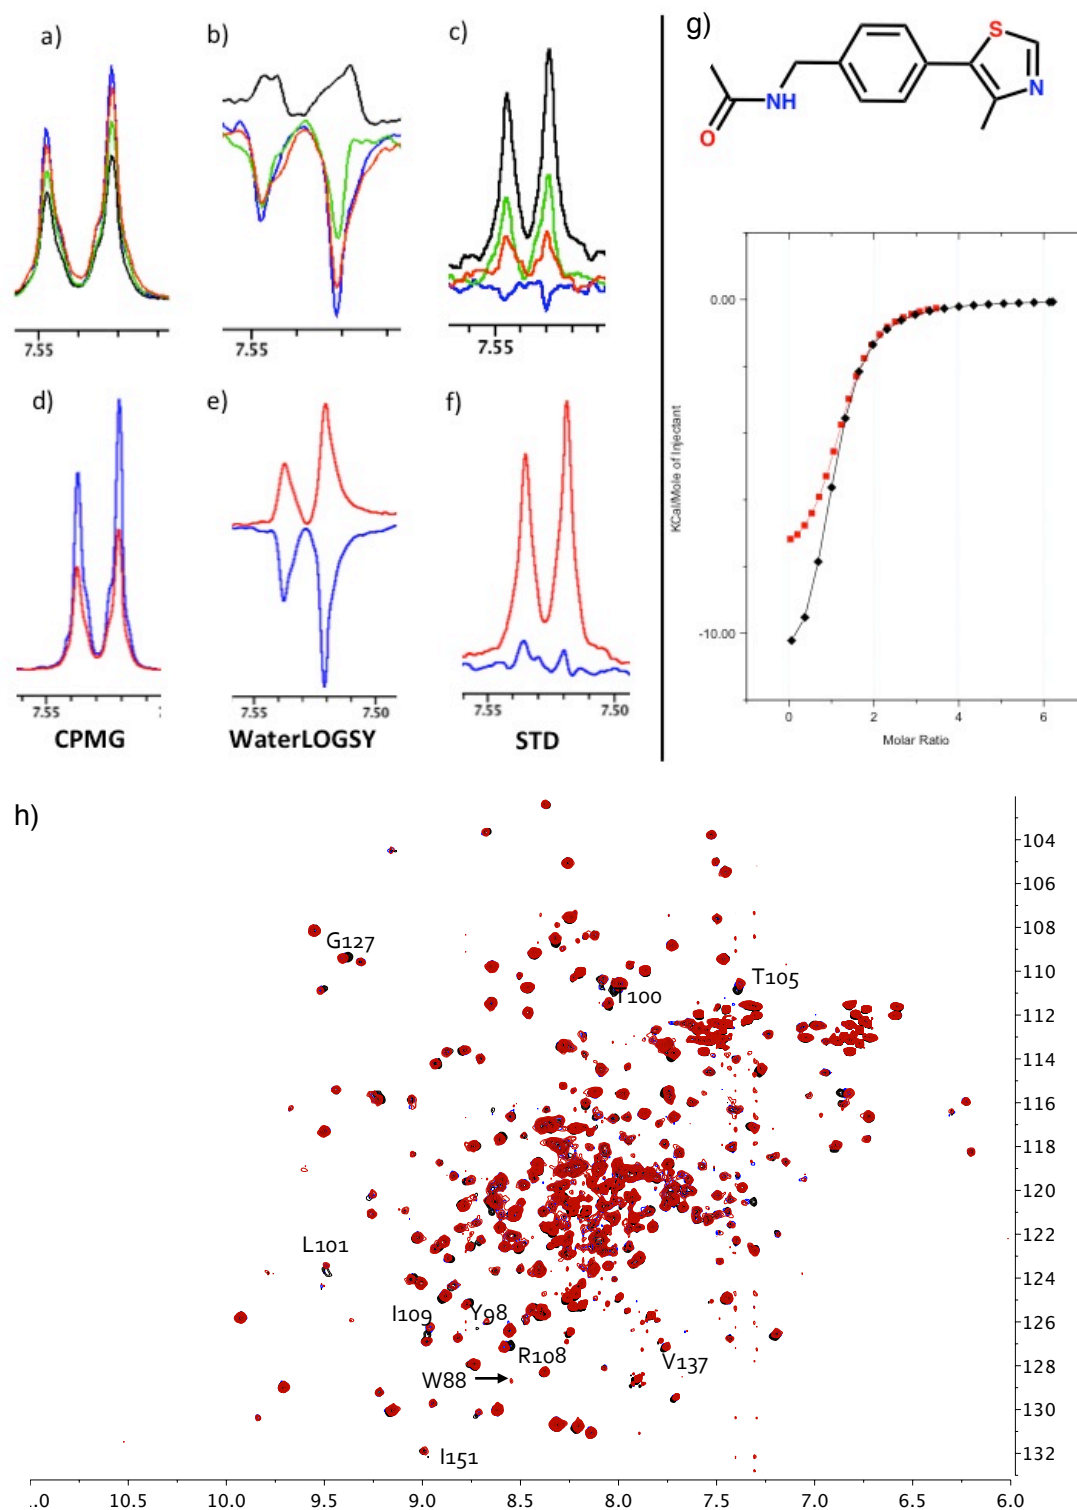

**Figure S8:** Binding detection using ligand-based NMR spectroscopy for **8**. Panels a), b) and c) depict spectra for VCB+**8** using set-ups 1 and 2 (red and black respectively), the compound alone (blue) and in competition with 100 μM 19-mer HIF-1α peptide under set-up 2 (green). Panels d), e) and f) depict spectra for VCB+**8** using set-up 3 (red) and compound alone (blue). g) Competitive ITC titration between **2** and **8**. Direct titration of **2** into 100 μM VCB is shown in the absence (black trace) and presence (red trace) of 3 mM of **8**. h) <sup>1</sup>H-<sup>15</sup>N HSQC of 0.3 mM VCB (black contours) and when titrated with 5 mM of **8** (red contours).

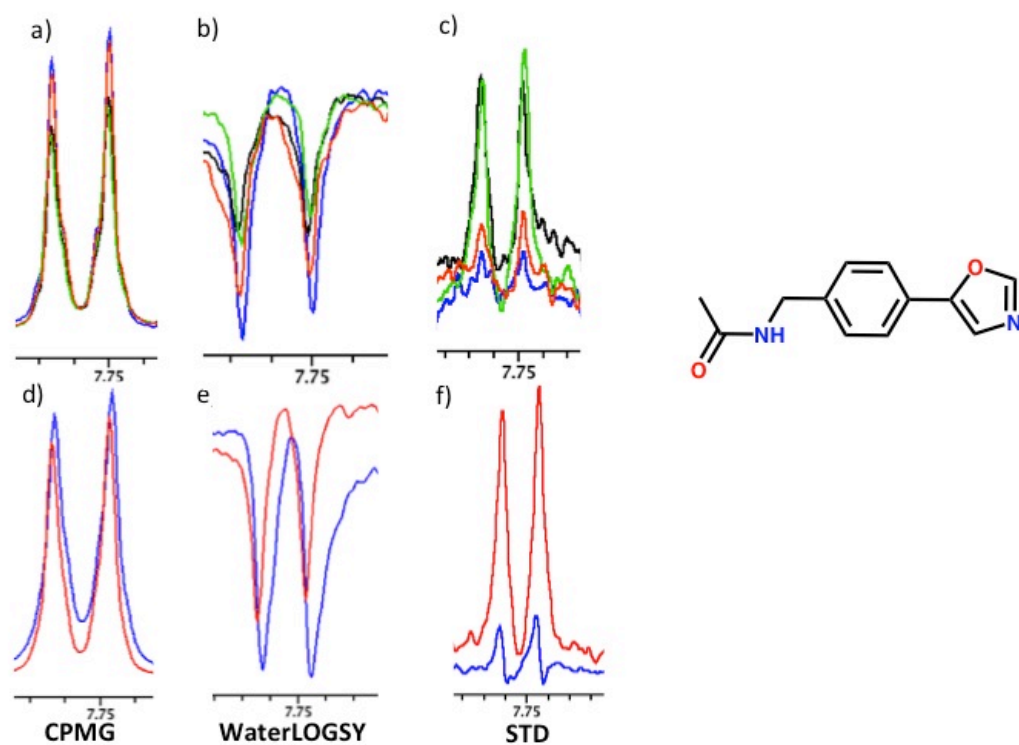

**Figure S9:** Binding detection using ligand-based NMR spectroscopy for **9**. Panels a), b) and c) depict spectra for VCB+**9** using set-ups 1 and 2 (red and black respectively), the compound alone (blue) and in competition with 100  $\mu$ M 19-mer HIF-1 $\alpha$  peptide under set-up 2 (green). Panels d), e) and f) depict spectra for VCB+**9** using set-up 3 (red) and compound alone (blue).

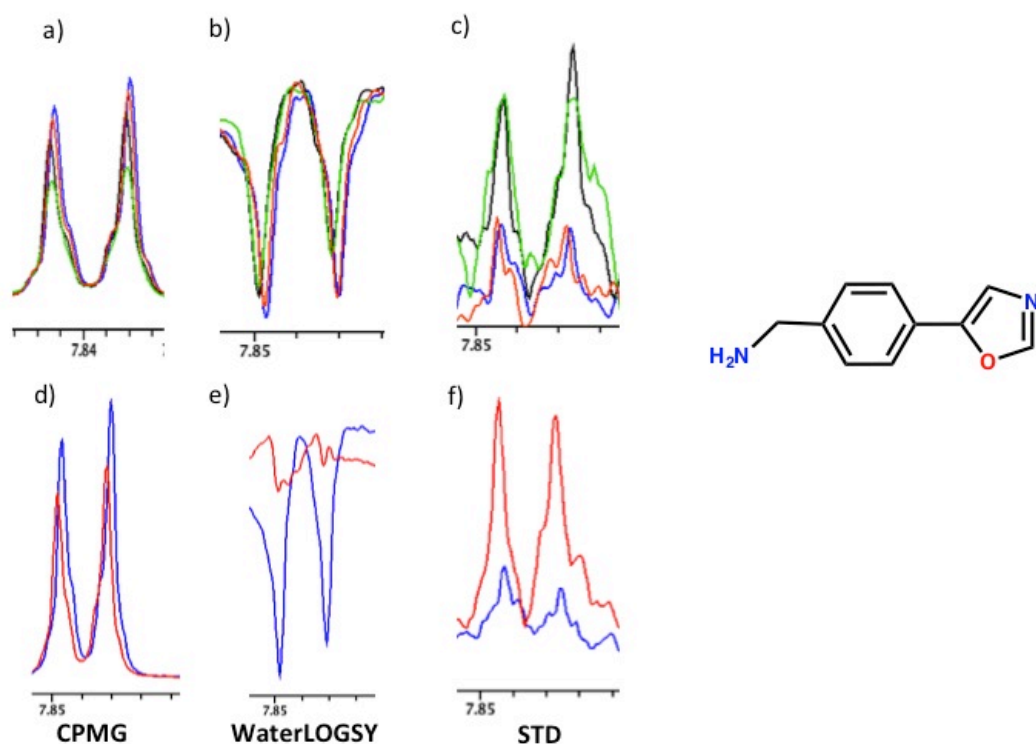

**Figure S10:** Binding detection using ligand-based NMR spectroscopy for **10**. Panels a), b) and c) depict spectra for VCB+**10** using set-ups 1 and 2 (red and black respectively), the compound alone (blue) and in competition with 100  $\mu$ M 19-mer HIF-1 $\alpha$  peptide under set-up 2 (green). Panels d), e) and f) depict spectra for VCB+**10** using set-up 3 (red) and compound alone (blue).

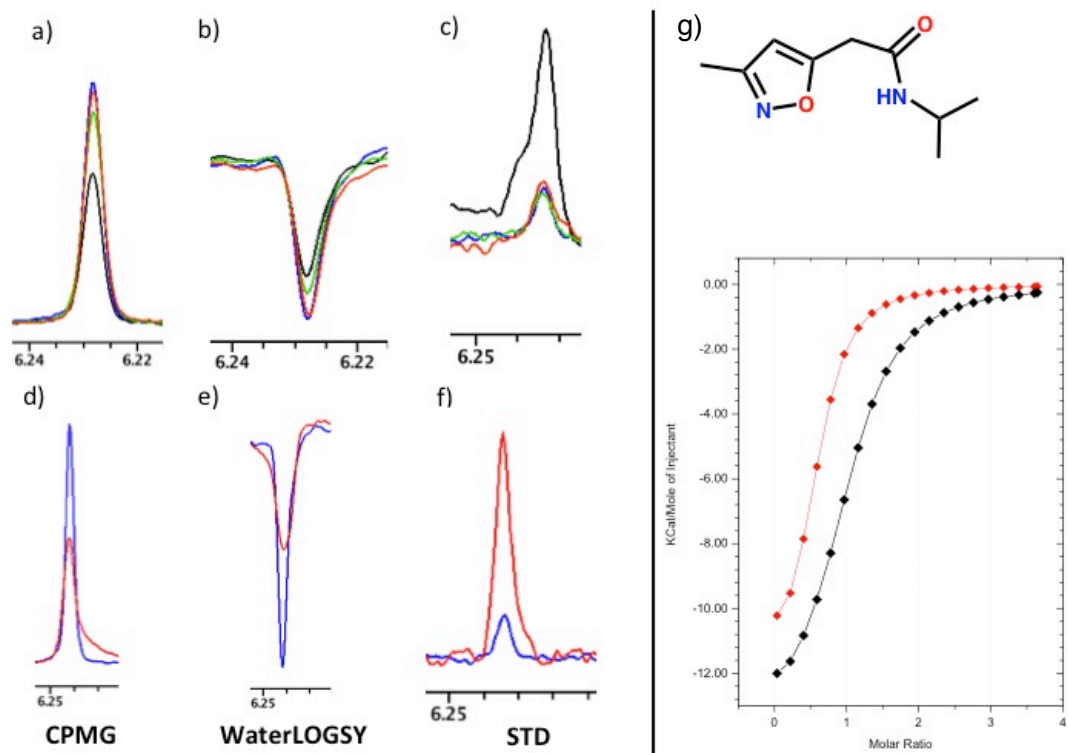

**Figure S11:** Binding detection using ligand-based NMR spectroscopy for **11**. Panels a), b) and c) depict spectra for VCB+**11** using set-ups 1 and 2 (red and black respectively), the compound alone (blue) and in competition with 100  $\mu$ M 19-mer HIF-1 $\alpha$  peptide under set-up 2 (green). Panels d), e) and f) depict spectra for VCB+**11** using set-up 3 (red) and compound alone (blue). g) Competitive ITC titration between **2** and **11**. Direct titration of **2** into 100  $\mu$ M VCB is shown in the absence (black trace) and presence (red trace) of 3 mM of **11**.

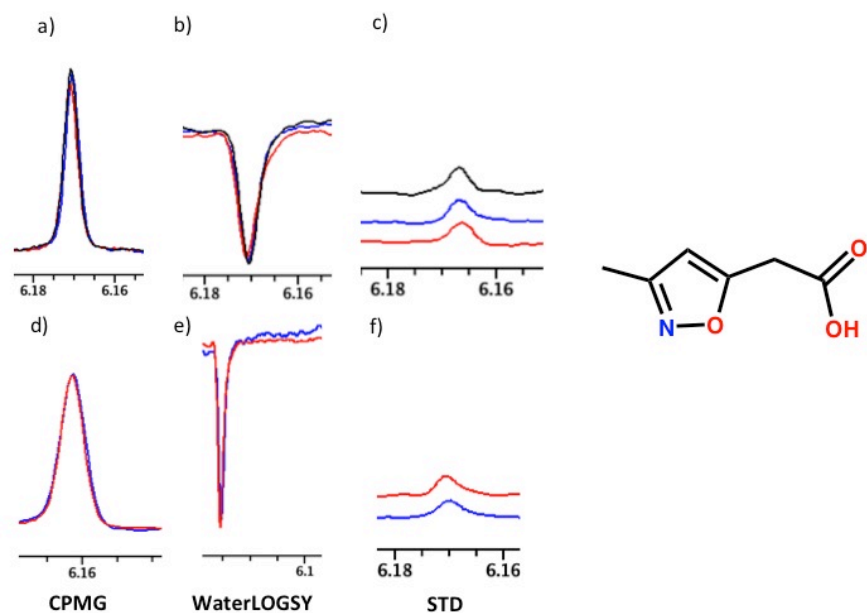

**Figure S12:** Binding detection using ligand-based NMR spectroscopy for **12**. Panels a), b) and c) depict spectra for VCB+**12** using set-ups 1 and 2 (red and black respectively). Panels d), e) and f) depict spectra for VCB+**12** using set-up 3 (red) and compound alone (blue)

## 7 – Group Epitope Mapping (GEM)

**Table S2.** GEM calculations for **6**.

| Proton | STD amplification factor <sup>6</sup> | GEM (%) |
|--------|---------------------------------------|---------|
| a      | 0.91                                  | 100     |
| b      | 0.91                                  | 100     |
| c      | 0.72                                  | 79      |
| d      | 0.20                                  | 22      |
| e      | 0.36                                  | 39      |

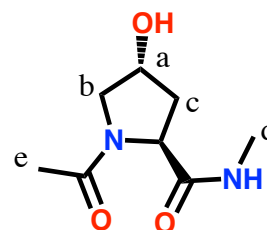

**Table S3.** GEM calculations for **8**.

| Proton | STD amplification factor <sup>6</sup> | GEM (%) |
|--------|---------------------------------------|---------|
| a      | 1.42                                  | 100     |
| b      | 0.81                                  | 57      |
| c      | 0.73                                  | 51      |
| d      | 0.35                                  | 25      |
| e      | 0.53                                  | 38      |
| f      | 0.49                                  | 35      |

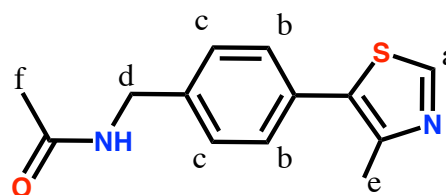

**Table S4.** GEM calculations for **11**.

| Proton | STD amplification factor <sup>6</sup> | GEM (%) |
|--------|---------------------------------------|---------|
| a      | 0.81                                  | 100     |
| b      | 0.18                                  | 22      |
| c      | 0.19                                  | 24      |
| d      | 0.43                                  | 53      |

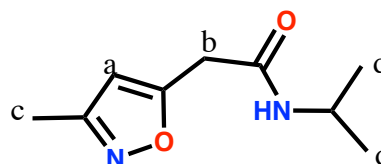

## 8 - References

- (1) Buckley, D. L.; Van Molle, I.; Gareiss, P. C.; Tae, H. S.; Michel, J.; Noblin, D. J.; Jorgensen, W. L.; Ciulli, A.; Crews, C. M. *J. Am. Chem. Soc.* **2012**, *134*, 4465–4468.
- (2) Van Molle, I.; Thomann, A.; Buckley, D. L.; So, E. C.; Lang, S.; M Crews, C. M.; Ciulli, A. *Chemistry & Biology* **2012**, *19*, 1300–1312.
- (3) Buckley, D. L.; Gustafson, J. L.; Van Molle, I.; Roth, A. G.; Tae, H. S.; Gareiss, P. C.; Jorgensen, W. L.; Ciulli, A.; Crews, C. M. *Angew. Chem. Int. Ed.* **2012**, *51*, 11463–11467.
- (4) a) Bricogne, G.; Blanc, E.; Brandl, M.; Flensburg, C.; Keller, P.; Paciorek, W.; Roversi, P.; Sharff, A.; Smart, O. S.; Vonnrhein, C.; Womack, T. O. **2011** BUSTER, Version 2.10.0 Ed., Global Phasing Ltd., Cambridge, UK; b) Smart, O. S.; Womack, T. O.; Flensburg, C.; Keller, P.; Paciorek, W.; Sharff, A.; Vonnrhein, C.; Bricogne, G. *Acta Crystallogr D Biol Crystallogr.* **2012**, *68*, 368–380.
- (5) Emsley, P.; Cowtan, K. *Acta Crystallogr D Biol Crystallogr.* **2004**, *60*, 2126–2132.
- (6) Mayer, M.; Meyer, B. *Angew. Chem. Int. Ed.* **1999**, *38*, 1784–1788.
